# Supplementary material for: Bacterial cellulose-derived carbon nanofibers as both anode and cathode for hybrid sodium ion capacitor
Source: Royal Society of Chemistry journal article supplement (doi:10.1039/c9ra10225f), 2020-01-01
Supplement: c9ra10225f1.pdf [file c9ra10225f1.pdf]

## **Supporting Information**

### **Bacterial Cellulose Derived Carbon Nanofibers as both Anode and Cathode for Hybrid Sodium Ion Capacitor**

Jiixin Xu, Zhanying Liu, Fang Zhang\*, Jie Tao, Laifa Shen, Xiaogang Zhang\*

Jiangsu Key Laboratory of Materials and Technology for Energy Conversion, College of Material Science and Engineering, Nanjing University of Aeronautics and Astronautics, Nanjing 210016, People's Republic of China

\*Corresponding authors. E-mail: zhangfang@nuaa.edu.cn

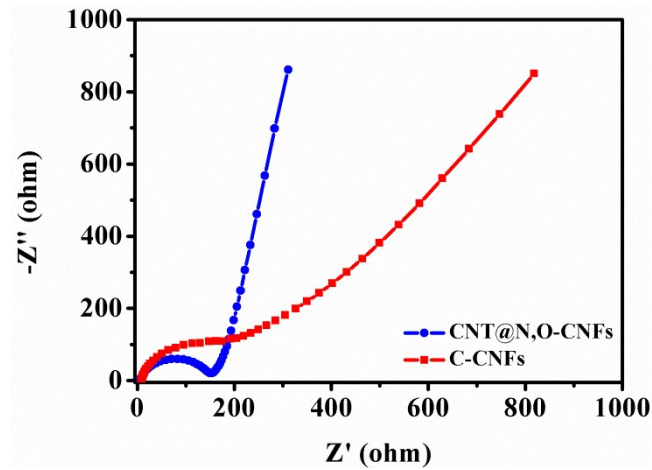

**Figure S1.** Nyquist plots of the CNT@N,O-CNFs and C-CNFs electrodes

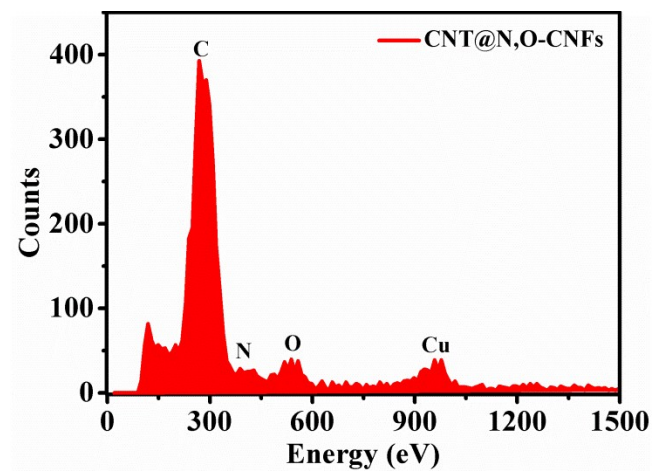

**Figure S2.** Energy dispersive X-ray spectroscopy analysis of CNT@N,O-CNFs

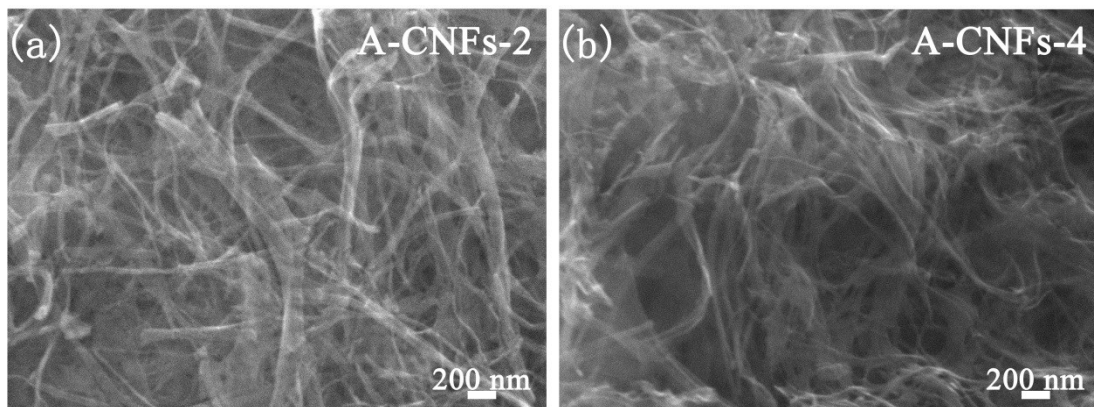

**Figure S3.** SEM images of (a) A-CNFs-2, (b) A-CNFs-4

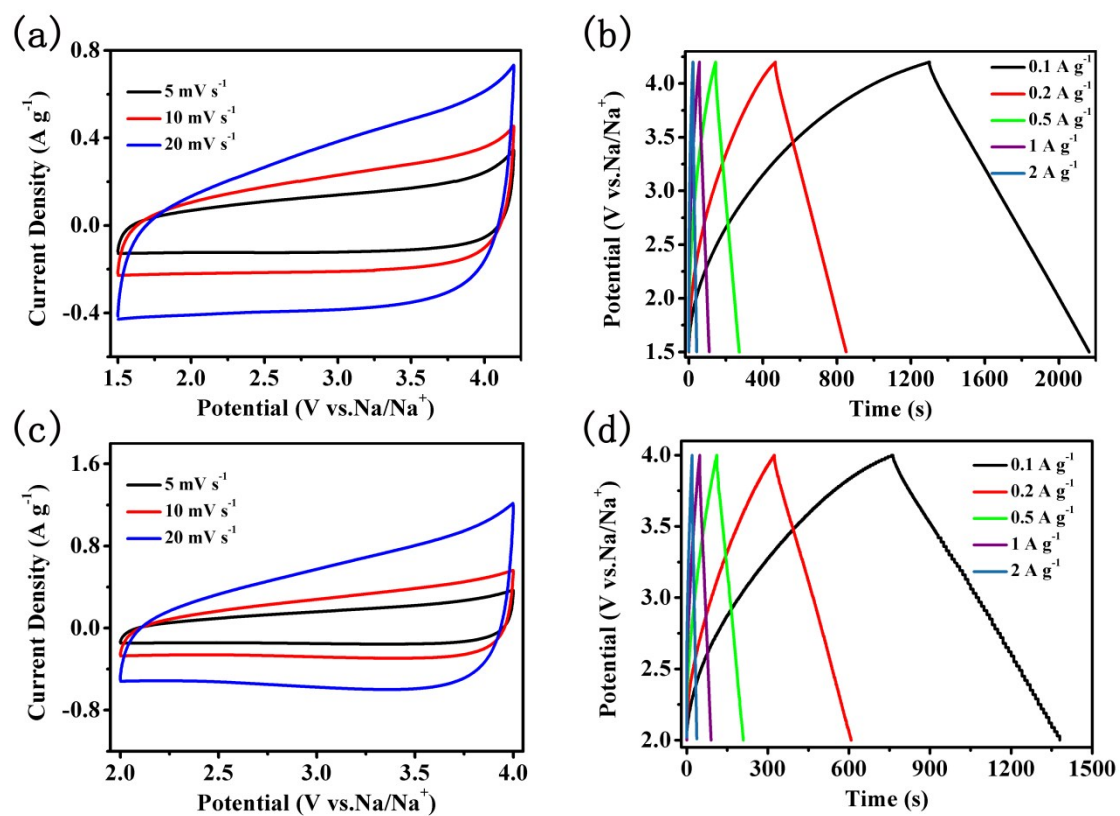

**Figure S4.** CV curves at various scan rates of 5 to 20 mV s<sup>-1</sup> in a potential range of (a) 1.5-4.2 V and (c) 2.0-4.0 V; Galvanostatic charge/discharge curves with various current densities from 0.1 to 2 A g<sup>-1</sup> in a potential range of (b) 1.5-4.2 V and (d) 2.0-4.0V;

**Table S1.** Comparison of the electrochemical performance of full-cell HICs

| System<br>(anode//cathode)             | Energy density<br>(Wh kg <sup>-1</sup> ) | Power density<br>(W kg <sup>-1</sup> ) | Capacity retention (%) / cycle<br>number / current density (A g <sup>-1</sup> ) | Ref.      |
|----------------------------------------|------------------------------------------|----------------------------------------|---------------------------------------------------------------------------------|-----------|
| CNTs@N,O-CNFs//A-CNFs                  | 59.2@275 W kg <sup>-1</sup>              | 5500@38.7 Wh kg <sup>-1</sup>          | 48.6%/5000/0.5                                                                  | This work |
| CS-800//CS-800-6                       | 52.2@300 W kg <sup>-1</sup>              | 3000@15.8 Wh kg <sup>-1</sup>          | 85.7%/2000/1                                                                    | 1         |
| S-N/CNTs//AC                           | 116.4@200 W kg <sup>-1</sup>             | 20000@48.2 Wh kg <sup>-1</sup>         | 81%/3000/2                                                                      | 2         |
| Na-TNT//AC                             | 34@120 W kg <sup>-1</sup>                | 889@13 Wh kg <sup>-1</sup>             | 80%/1000/0.25                                                                   | 3         |
| NVP@AC//NVP@AC                         | 26@270 W kg <sup>-1</sup>                | 5424@15 Wh kg <sup>-1</sup>            | 64.5%/10000/1.17                                                                | 4         |
| Nb <sub>2</sub> O <sub>5</sub> //AC    | 43.2@160 W kg <sup>-1</sup>              | 5760@24 Wh kg <sup>-1</sup>            | 80%/3000/1.28                                                                   | 5         |
| MWTOG//AC                              | 64.2@56 W kg <sup>-1</sup>               | 1357@25.8 Wh kg <sup>-1</sup>          | 90%/10000/3.35                                                                  | 6         |
| V <sub>2</sub> O <sub>5</sub> @CNT//AC | 38@140 W kg <sup>-1</sup>                | 5000@7.5 Wh kg <sup>-1</sup>           | 80%/900/60 C                                                                    | 7         |

## References

1. S. Wang, R. Wang, Y. Zhang, D. Jin and L. Zhang, *J. Power Sources*, 2018, **379**, 33-40.
2. K. Liao, H. Wang, L. Wang, D. Xu, M. Wu, R. Wang, B. He, Y. Gong and X. Hu, *Nanoscale. Adv*, 2019, **1**, 746-756.
3. J. Yin, L. Qi and H. Wang, *Acs Appl. Mater. Interfaces*, 2012, **4**, 2762-2768.
4. Z. Jian, V. Raju, Z. Li, Z. Xing, Y. S. Hu and X. Ji, *Adv. Funct. Mater.*, 2015, **25**, 5778-5785.
5. H. Li, Y. Zhu, S. Dong, L. Shen, Z. Chen, X. Zhang and G. Yu, *Chem. Mater.*, 2016, **28**, 5753-5760.
6. Z. Le, F. Liu, P. Nie, X. Li, X. Liu, Z. Bian, G. Chen, H. B. Wu and Y. Lu, *ACS nano*, 2017, **11**, 2952-2960.
7. Z. Chen, V. Augustyn, X. Jia, Q. Xiao, B. Dunn and Y. Lu, *ACS nano*, 2012, **6**, 4319-4327.
